# Supplementary material
Source: PubMed Central journal article supplement (PMC1166604)
Supplement: pnas_0502019102_1.pdf [file pnas_0502019102_1.pdf]

Table 4. Detailed paternity analysis information from analysis of 48 offspring

| Group            | Offspring      | No. mother-offspring |           | $P_{ex(a)}$ | $P_{ex(b)}$ | Cervus confidence values |                         |          |          |
|------------------|----------------|----------------------|-----------|-------------|-------------|--------------------------|-------------------------|----------|----------|
|                  |                | loci compared        | Father    |             |             | all group males sampled  | 90% group males sampled |          |          |
| <b>Beetsme's</b> | Kuryama        | 5                    | TITUS     | 0.9991      | 0.9992      | 7.53E+00                 | *                       | 7.53E+00 | *        |
|                  | JoliAmi        | 0                    | BEETSME   | 0.9974      | 0.9988      | 3.27E+00                 | *                       | 3.27E+00 | *        |
|                  | Umuco          | 8                    | TITUS     | 0.9982      | 0.9993      | 4.47E+00                 | *                       | 4.47E+00 | *        |
|                  | Bwenge         | 9                    | TITUS     | 0.9993      | 0.9996      | 7.15E+00                 | *                       | 7.15E+00 | *        |
|                  | Ubibwigenge    | 9                    | TITUS     | 0.9969      | 0.9980      | 5.41E+00                 | *                       | 5.41E+00 | *        |
|                  | Pasika         | 6                    | TITUS     | 0.9978      | 0.9984      | 7.00E+00                 | *                       | 7.00E+00 | *        |
|                  | Kirahure       | 5                    | BEETSME   | 0.9886      | 0.9889      | 3.74E+00                 | *                       | 3.74E+00 | *        |
|                  | Umushikirano   | 0                    | TITUS     | 0.9702      | 0.9735      | 2.02E+00                 | *                       | 2.02E+00 | *        |
|                  | Vuba           | 9                    | TITUS     | 0.9967      | 0.9985      | 5.06E+00                 | *                       | 5.06E+00 | *        |
|                  | Bukima         | 6                    | TITUS     | 0.9926      | 0.9944      | 4.66E+00                 | *                       | 4.66E+00 | *        |
|                  | Inziza         | 9                    | TITUS     | 0.9999      | 0.9999      | 9.65E+00                 | *                       | 9.65E+00 | *        |
|                  | Tuyizere       | 9                    | TITUS     | 0.9995      | 0.9999      | 5.23E+00                 | *                       | 5.23E+00 | *        |
|                  | Dushirehamwe   | 7                    | TITUS     | 0.9544      | 0.9613      | 3.20E+00                 | *                       | 3.20E+00 | *        |
|                  | Gufasha        | 7                    | TITUS     | 0.9978      | 0.9985      | 2.30E+00                 | *                       | 2.30E+00 | *        |
|                  | Turakora       | 6                    | TITUS     | 0.9887      | 0.9929      | 1.77E+00                 | *                       | 1.77E+00 | *        |
|                  | <b>Group 5</b> | Gwiza                | 7         | ZIZ         | 0.9956      | 0.9974                   | 2.47E+00                | *        | 2.47E+00 |
| Ugenda           |                | 8                    | ZIZ       | 0.9982      | 0.9927      | 2.39E+00                 | *                       | 2.39E+00 | *        |
| Inshuti          |                | 13                   | ZIZ       | 0.9996      | 0.9986      | 1.56E+00                 | *                       | 1.56E+00 | *        |
| Makuba           |                | 0                    | ZIZ       | 0.9979      | 0.9906      | 3.90E+00                 | *                       | 3.90E+00 | *        |
| Kubaka           |                | 0                    | ZIZ       | 0.8227      | 0.8217      | 9.36E-01                 | *                       | 9.36E-01 | +        |
| Ugutsinda        |                | 6                    | PABLO     | 0.9898      | 0.9910      | 3.30E+00                 | *                       | 3.30E+00 | *        |
| Turatsinze       |                | 8                    | ZIZ       | 0.9959      | 0.9914      | 5.46E-01                 | *                       | 5.46E-01 | +        |
| Urugamba         |                | 9                    | ZIZ       | 0.9997      | 0.9987      | 1.78E+00                 | *                       | 1.78E+00 | *        |
| Nahimana         |                | 6                    | ZIZ       | 0.9984      | 0.9937      | 2.55E+00                 | *                       | 2.55E+00 | *        |
| Twizere          |                | 7                    | ZIZ       | 0.9941      | 0.9897      | 2.11E+00                 | *                       | 2.11E+00 | *        |
| Isabukuru        |                | 0                    | ZIZ       | 0.9926      | 0.9383      | 2.63E+00                 | *                       | 2.63E+00 | *        |
| Muzeneza         |                | 7                    | ZIZ       | 0.9988      | 0.9999      | 7.82E-01                 | *                       | 7.82E-01 | +        |
| Ukuri            |                | 9                    | PABLO     | 0.9998      | 0.9982      | 4.16E+00                 | *                       | 4.16E+00 | *        |
| <b>Pablo's</b>   |                | Mapendo              | 8         | PABLO       | 0.9965      | 0.9960                   | 3.58E+00                | *        | 3.58E+00 |
|                  | Mahirwe        | 12                   | PABLO     | 0.9999      | 0.9989      | 4.38E+00                 | *                       | 4.38E+00 | *        |
|                  | Rukundo        | 0                    | PABLO     | 0.9820      | 0.9674      | 3.85E-01                 | +                       | 3.85E-01 | +        |
|                  | Gicurasi       | 8                    | CANTSBEE  | 0.9830      | 0.9805      | 3.43E+00                 | *                       | 3.43E+00 | *        |
|                  | Mitimbili      | 11                   | CANTSBEE  | 0.9998      | 0.9996      | 5.24E+00                 | *                       | 5.24E+00 | *        |
|                  | Bikereri       | 0                    | CANTSBEE  | 0.9270      | 0.9084      | 6.19E-01                 | *                       | 6.19E-01 | +        |
|                  | Gushimira      | 5                    | CANTSBEE  | 0.9657      | 0.9649      | 3.10E+00                 | *                       | 3.10E+00 | *        |
|                  | Twihangane     | 6                    | CANTSBEE  | 0.9456      | 0.9101      | 3.11E+00                 | *                       | 3.11E+00 | *        |
|                  | Musilikale     | 8                    | CANTSBEE  | 0.9855      | 0.9779      | 4.42E+00                 | *                       | 4.42E+00 | *        |
|                  | Kureba         | 11                   | CANTSBEE  | 0.9999      | 0.9993      | 6.43E+00                 | *                       | 6.43E+00 | *        |
|                  | Kubaha         | 9                    | CANTSBEE  | 0.9976      | 0.9786      | 4.24E+00                 | *                       | 4.24E+00 | *        |
|                  | Umutekano      | 10                   | CANTSBEE  | 0.9943      | 0.9899      | 4.97E+00                 | *                       | 4.97E+00 | *        |
|                  | Urugero        | 4                    | CANTSBEE  | 0.9214      | 0.9335      | 2.08E+00                 | *                       | 2.08E+00 | *        |
|                  | Iyambere       | 6                    | CANTSBEE  | 0.9558      | 0.9519      | 3.51E+00                 | *                       | 3.51E+00 | *        |
| <b>Shinda's</b>  | Wageni         | 8                    | SHINDA    | 0.9997      | 0.9979      | 2.70E+00                 | *                       | 2.70E+00 | *        |
|                  | Kanama         | 14                   | SHINDA    | 0.9998      | 0.9981      | 4.28E+00                 | *                       | 4.28E+00 | *        |
|                  | Kurudi         | 4                    | SHINDA    | 0.9682      | 0.9837      | 1.99E+00                 | *                       | 1.99E+00 | *        |
|                  | Twibuke        | 0                    | SHINDA    | 0.9784      | 0.9856      | 3.96E+00                 | *                       | 3.96E+00 | *        |
|                  | Imvune         | 8                    | SHINDA    | 0.9999      | 0.9999      | 6.83E+00                 | *                       | 6.83E+00 | *        |
|                  | Tegereza       | 0                    | notSHINDA | nd          | nd          | nd                       | nd                      | nd       | nd       |

$P_{ex(a)}$  is the paternity exclusion probability calculated using allele frequencies from all individuals.

$P_{ex(b)}$  is the paternity exclusion probability calculated with offspring excluded from the allele frequency calculation.

An asterisk (\*) or (+) indicates that the given delta value met the strict (95%) or relaxed (80%) confidence level, respectively.
